# Supplementary material for: Ladder fuels rather than canopy volumes consistently predict wildfire severity even in extreme topographic-weather conditions
Source: PubMed Central journal article supplement — Commun Earth Environ. 2024 Nov 20;5(1):721. doi: 10.1038/s43247-024-01893-8 (PMC11578889; doi:10.1038/s43247-024-01893-8), 2024-11-20
Supplement: 43247_2024_1893_MOESM2_ESM.pdf [file 43247_2024_1893_MOESM2_ESM.pdf]

**Supplementary Information:** Hakkenberg et.al. (2024). *Ladder fuels rather than canopy volumes consistently predict wildfire severity even in extreme topographic-weather conditions.*

**Supplement S1: Wildfires description**

Table S1.1. Description of 42 large (>2000 ha) wildfires in California's North Coast, Central Coast, and Sierras regions between 2019-2021.

| Name                  | Abbv. | Year | Region        | Start date | End date | Size (ha) |
|-----------------------|-------|------|---------------|------------|----------|-----------|
| AUGUST COMPLEX        | AC    | 2020 | North Coast   | 8/16/24    | 11/11/24 | 417919    |
| BRICEBURG             | BG    | 2019 | Sierras       | 10/6/24    | 10/20/24 | 2229      |
| CALDOR                | CR    | 2021 | Sierras       | 8/15/24    | 11/18/24 | 89754     |
| CARMEL                | CL    | 2020 | Central Coast | 8/18/24    | 9/6/24   | 2832      |
| CASTLE                | CE    | 2020 | Sierras       | 8/19/24    | 1/4/24   | 69059     |
| CREEK                 | CK    | 2020 | Sierras       | 9/4/24     | 12/24/24 | 153717    |
| CREWS                 | CS    | 2020 | Central Coast | 7/5/24     | 7/15/24  | 2231      |
| CZU LIGHTNING COMPLEX | CZU   | 2020 | Central Coast | 8/16/24    | 9/24/24  | 35027     |
| DEVIL                 | DL    | 2020 | North Coast   | 9/9/24     | 11/16/24 | 3590      |
| DIXIE                 | DE    | 2021 | Sierras       | 7/14/24    | 10/25/24 | 389877    |
| DOLAN                 | DN    | 2020 | Central Coast | 8/18/24    | 12/31/24 | 50394     |
| FAWN                  | FN    | 2021 | Sierras       | 9/22/24    | 9/29/24  | 3471      |
| FRENCH                | FH    | 2021 | Sierras       | 8/18/24    | 10/19/24 | 10738     |
| GLASS                 | GS    | 2020 | Central Coast | 9/27/24    | 10/20/24 | 27310     |
| HENNESSEY             | HY    | 2020 | Central Coast | 8/17/24    | 9/16/24  | 123572    |
| HOG                   | HG    | 2020 | Sierras       | 7/18/24    | 8/28/24  | 3871      |
| KINCADE               | KE    | 2019 | Central Coast | 10/23/24   | 11/10/24 | 31469     |
| KNP Complex           | KNP   | 2021 | Sierras       | 9/10/24    | 12/16/24 | 35716     |
| LOYALTON              | LN    | 2020 | Sierras       | 8/14/24    | 8/27/24  | 18907     |
| MCCASH                | MH    | 2021 | North Coast   | 8/1/24     | 10/27/24 | 38433     |
| MCFARLAND             | MD    | 2021 | North Coast   | 7/30/24    | 10/26/24 | 49553     |
| MINERAL               | ML    | 2020 | Central Coast | 7/13/24    | 7/26/24  | 12006     |
| MONUMENT              | MT    | 2021 | North Coast   | 7/31/24    | 11/3/24  | 90289     |
| NORTH COMPLEX         | NC    | 2020 | Sierras       | 8/17/24    | 12/3/24  | 129013    |
| RATTLESNAKE           | RS    | 2020 | Sierras       | 8/16/24    | 12/28/24 | 3409      |
| RED SALMON COMPLEX    | RN    | 2020 | North Coast   | 7/27/24    | 11/19/24 | 58208     |
| RIVER                 | RR    | 2020 | Central Coast | 8/16/24    | 9/4/24   | 20321     |
| RIVER COMPLEX         | RC    | 2021 | North Coast   | 7/31/24    | 10/25/24 | 80676     |
| SALT                  | ST    | 2021 | North Coast   | 6/30/24    | 10/26/24 | 5099      |
| SCU COMPLEX           | SCU   | 2020 | Central Coast | 8/16/24    | 9/11/24  | 160589    |

**Supplementary Information:** Hakkenberg et.al. (2024). *Ladder fuels rather than canopy volumes consistently predict wildfire severity even in extreme topographic-weather conditions.*

|            |     |      |               |         |          |       |
|------------|-----|------|---------------|---------|----------|-------|
| SHEEP      | SP  | 2020 | Sierras       | 8/17/24 | 9/7/24   | 11955 |
| SLATER     | SR  | 2020 | North Coast   | 9/8/24  | 12/12/24 | 63710 |
| SLINK      | SK  | 2020 | Sierras       | 8/29/24 | 11/13/24 | 10826 |
| SOUTH      | SH  | 2019 | North Coast   | 9/5/24  | 12/2/24  | 2159  |
| STAGECOACH | SC  | 2020 | Sierras       | 8/3/24  | 8/3/24   | 3137  |
| SUGAR      | SGR | 2021 | Sierras       | 7/2/24  | 10/28/24 | 42494 |
| TABOOSE    | TE  | 2019 | Sierras       | 9/4/24  | 11/23/24 | 4155  |
| WALKER     | WR  | 2019 | Sierras       | 9/4/24  | 1/15/24  | 22102 |
| WALKERS    | WS  | 2021 | Sierras       | 8/15/24 | 12/8/24  | 3553  |
| WALLBRIDGE | WB  | 2020 | Central Coast | 8/17/24 | 9/2/24   | 22342 |
| WINDY      | WY  | 2021 | Sierras       | 9/10/24 | 11/11/24 | 39468 |
| ZOGG       | ZG  | 2020 | North Coast   | 9/27/24 | 10/13/24 | 22799 |

---

**Supplementary Information:** Hakkenberg et.al. (2024). *Ladder fuels rather than canopy volumes consistently predict wildfire severity even in extreme topographic-weather conditions.*

**Supplement S2: spGLMM beta coefficients**

Table S2.1. Standardized slope estimates spatial GLMM (spGLMMs) quadratic regressions between standardized (std) fuel structure metrics and wildfire severity based on dNBR. Low and high credible intervals (CI), as well as mean estimates. spGLMM beta coefficients correspond to Fig. 3b.

| Variable      | Abbr.               | $\beta_1$ coefficients<br>(linear term) |        |         | $\beta_1$ coefficients<br>(quadratic term) |         |         |
|---------------|---------------------|-----------------------------------------|--------|---------|--------------------------------------------|---------|---------|
|               |                     | low CI                                  | mean   | high CI | low CI                                     | mean    | high CI |
| Biomass       | AGBD                | 0.0138                                  | 0.0619 | 0.1099  | -0.0398                                    | -0.0341 | -0.0284 |
| Canopy height | RH98                | 0.0094                                  | 0.0579 | 0.1064  | -0.022                                     | -0.0164 | -0.0109 |
| Layering      | nmode               | 0.055                                   | 0.0959 | 0.1367  | -0.0175                                    | -0.0109 | -0.0042 |
| Ladder fuels  | mPAI <sub>10m</sub> | 0.0615                                  | 0.0878 | 0.1141  | -0.0387                                    | -0.0321 | -0.0256 |

**Supplementary Information:** Hakkenberg et.al. (2024). *Ladder fuels rather than canopy volumes consistently predict wildfire severity even in extreme topographic-weather conditions.*

### Supplement S3: Region, forest type and year

Among all wildfires assessed, 7 occurred in the Central Coast, 16 were in the North Coast, and 19 were located in the Sierras region. Among the >803K GEDI samples, 67% occurred in conifer forests, 16% occurred in hardwoods, and 16% were in mixed forests. 5 wildfires occurred in 2019, while 24 were in 2020 and 13 in 2021 (Fig. S2.1).

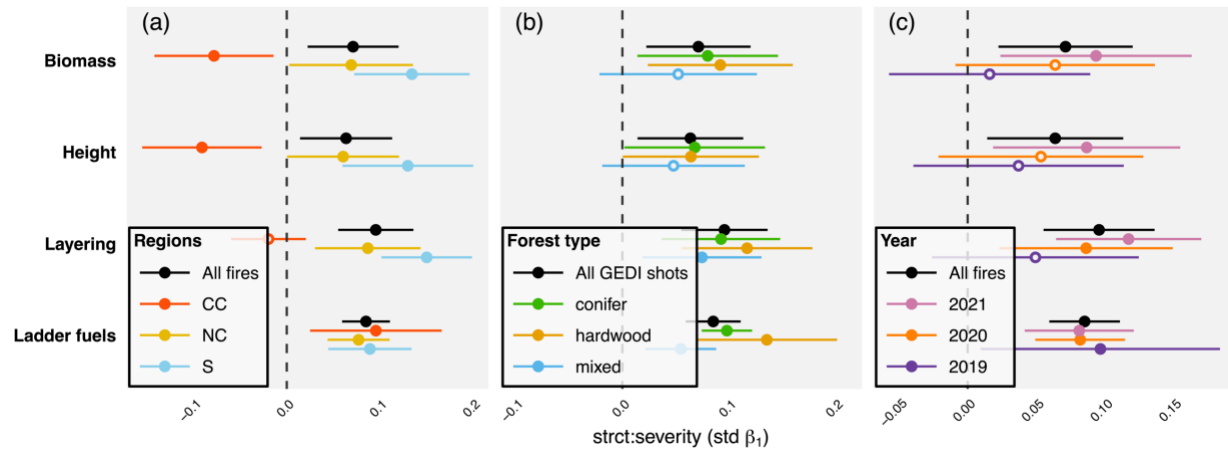

**Figure S3.1. Fuel structure - fire severity relationships subset by region, forest type and year.** Data were subset into (a) wildfires occurring in the Central Coast (CC), North Coast (NC) and Sierras (S) regions; (b) conifer, hardwoods and mixed forest types; (c) and fire year. Standardized slope estimates (std.  $\beta_1$ ) represent linear effects from a series of spatial GLMMs. Terms not significant (open symbol) when the credible interval includes zero (dashed vertical line). In each case the "all" category represents all data, without subsetting (equivalent to Fig. 4) for comparison.

Subsetting wildfires by region reveals that unlike main effects from all data, biomass and height are negatively related to severity in the Central Coast while ladder fuels are significantly, positively related to severity across all regions (Fig. S3.1a). Among the 42 wildfires in the study domain, 7 occurred in the Central Coast (CC), 16 in the North Coast (NC) and 19 in the Sierras (S). When split by forest type, the significant positive structure-severity relationships found in the full dataset ("all GEDI shots") are likewise observed in conifer and hardwood forests, and in mixed forests for canopy layering and ladder fuel metrics (Fig. S3.1b). Unlike the per-wildfire split across regions, forest type is unique to all 830K GEDI samples and splits approximately as 67%, 16% and 16% for conifer, hardwoods and mixed forests, respectively. Finally, subsetting by year reveals that all structure-severity relationships from 2021 wildfires are significant and positive, with a minority of relationships from 2019 and 2020 being so (Fig. S3.1c). Only in the case of ladder fuels is the structure-severity relationship significant in all years. Fire year is closely related to data volumes. With GEDI data coming online in 2019, a far smaller proportion of GEDI shots were available corresponding to time before the fire compared with 2021. Thus while 5, 24, 13 wildfires occurred in 2019-2021, respectively, the total footprint sample sizes increases consistently with year: comprising 0.4%, 41.6%, and 58% of the total dataset for the three years 2019-2021.

**Supplementary Information:** Hakkenberg et.al. (2024). *Ladder fuels rather than canopy volumes consistently predict wildfire severity even in extreme topographic-weather conditions.*

#### Supplement S4: Spearman correlation matrices

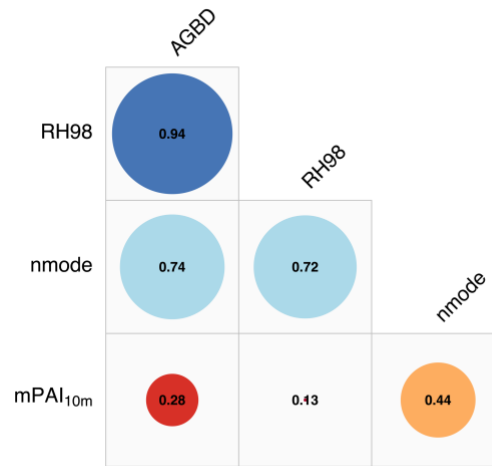

**Figure S4.1. Spearman correlation matrix among GEDI structural metrics.** Biomass from GEDI's L4 aboveground biomass density (AGBD) product; Canopy height, or the 98 percentile of relative heights (RH98); Canopy layering based on the number of modes in the raw GEDI waveform profile (nmode); and Ladder fuels, which we characterize using the mean PAI below 10 m, for all canopies with RH98 >10 m (mPAI<sub>10m</sub>). Boxes empty when terms not significant ( $p < .05$ ). See Table 1.

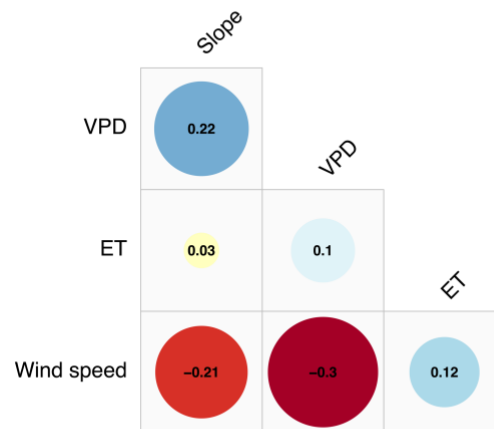

**Figure S4.2. Spearman correlation matrix among topo-weather metrics.** 10-m resolution topographic slope ( $^{\circ}$ ), 4-km resolution vapor pressure deficit (VPD) in kPa, evapotranspiration (ET) as mm/8days, 4-km resolution wind speed (m/s). Boxes empty when terms not significant ( $p < .05$ ). See Table 1.

**Supplementary Information:** Hakkenberg et.al. (2024). *Ladder fuels rather than canopy volumes consistently predict wildfire severity even in extreme topographic-weather conditions.*

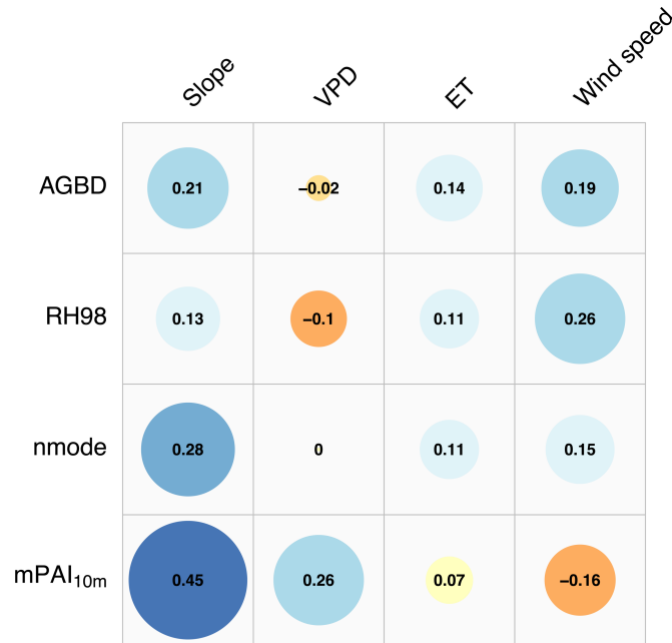

**Figure S4.3. Spearman correlation matrix between GEDI structural metrics and topo-weather variables.** GEDI structure: Biomass from GEDI's L4 aboveground biomass density (AGBD) product; Canopy height, or the 98 percentile of relative heights (RH98); Canopy layering based on the number of modes in the raw GEDI waveform profile (nmode); and Ladder fuels, which we characterize using the mean PAI below 10 m, for all canopies with RH98 >10 m (mPAI<sub>10m</sub>). Topo-weather: 10-m resolution topographic slope (°), 4-km resolution vapor pressure deficit (VPD) in kPa, evapotranspiration (ET) as mm/8days, 4-km resolution wind speed (m/s). Boxes empty when terms not significant ( $p < .05$ ). See Table 1.

**Supplementary Information:** Hakkenberg et.al. (2024). *Ladder fuels rather than canopy volumes consistently predict wildfire severity even in extreme topographic-weather conditions.*

**Supplement S5: Supplementary results for figures 3-5 for forests >10m only.**

Supplementary results for Figures 3-5, based on forests >10m only. This criterion, set to ensure sample size and sample set compatibility between ladder fuels which have a >10m criteria and other metrics (e.g. biomass, height and layering). This reduced the sample size from 830,709 to 734,592 samples, or an 11.6% reduction.

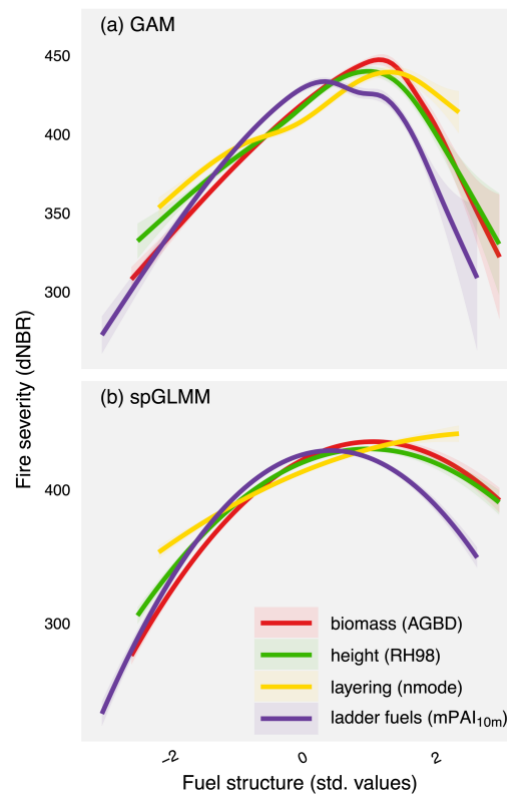

**Figure S5.1. Generalized relationships between fuel structure and wildfire severity for forests >10m.** (a) Generalized Additive Models (GAMs) and (b) spatial GLMM (spGLMMs) quadratic regressions between standardized (std) fuel structure metrics and wildfire severity based on dNBR. Linear and quadratic coefficients in the four spGLMMs were positive and negative, respectively, and significant at  $p < 0.05$  (S2.1).

**Supplementary Information:** Hakkenberg et.al. (2024). *Ladder fuels rather than canopy volumes consistently predict wildfire severity even in extreme topographic-weather conditions.*

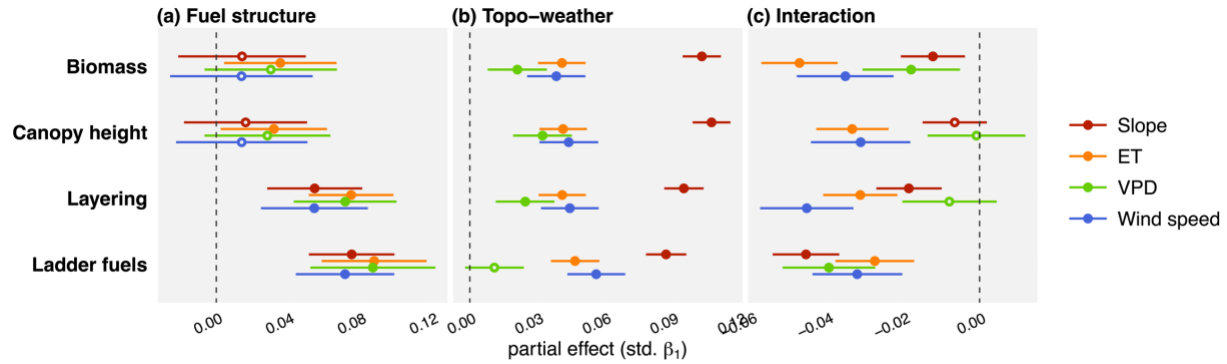

**Figure S5.2. Partial and interactive effects of fuel structure and topo-weather on fire severity for forests >10m.** Standardized slope estimates (std.  $\beta_1$ ) represent the partial linear effects of (a) fuel structure, (b) topographic and weather variables, or “topo-weather”, and (c) their interaction on wildfire severity from a series of spGLMMs. Across all combinations of fuel structure and topo-weather, partial effects correspond to the linear effect of a given predictor on dNBR-based severity (response) after accounting for the effect of the other predictor, plus its interaction. Median posterior estimate (points) and associated 95% credible interval (error bars); terms not significant (open symbol) when the credible interval includes zero (dashed vertical line).

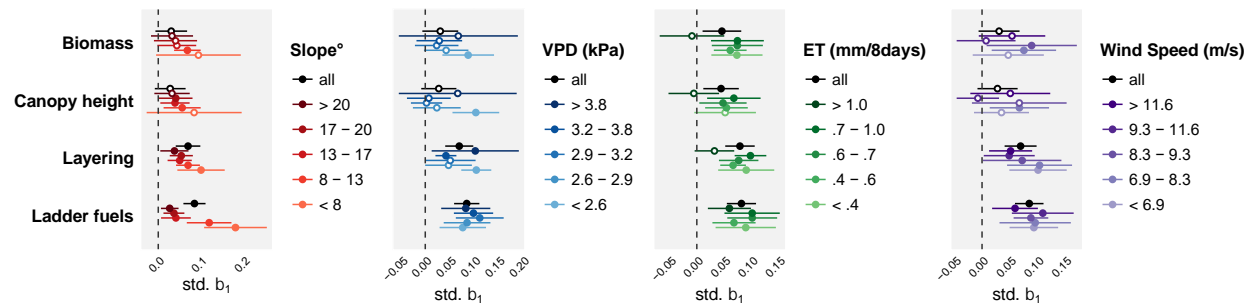

**Figure S5.3. Effects of fuel structure on fire severity across five levels of topo-weather for forests >10m.** Standardized slope estimates (std.  $\beta_1$ ) represent the univariate, linear effects of GEDI-derived fuel structural variables on dNBR wildfire severity from a series of spGLMMs. Model results were obtained from all data samples (“all”) in addition to subsets defined as five equal-sized classes stratified by their corresponding topography and fire weather variables. Median posterior estimate (points) and associated 95% credible interval (error bars); terms not significant (open symbol) when the credible interval includes zero (dashed vertical line).
